# Supplementary material for: Risk Factors, Clinical Features, and Management of Community-Acquired Staphylococcus aureus Pneumonia in Chongqing, China
Source: Research Square preprint supplement (doi:10.21203/rs.3.rs-7255128/v1), 2025-09-09
Supplement: Supplementary file 1 [file a3fdbbfa21c7cf1fafe4d54c.docx]

**Supplementary figure 1.**A corresponding bar chart comparing prognosis between *S. aureus* CAP and non-*S. aureus* CAP .


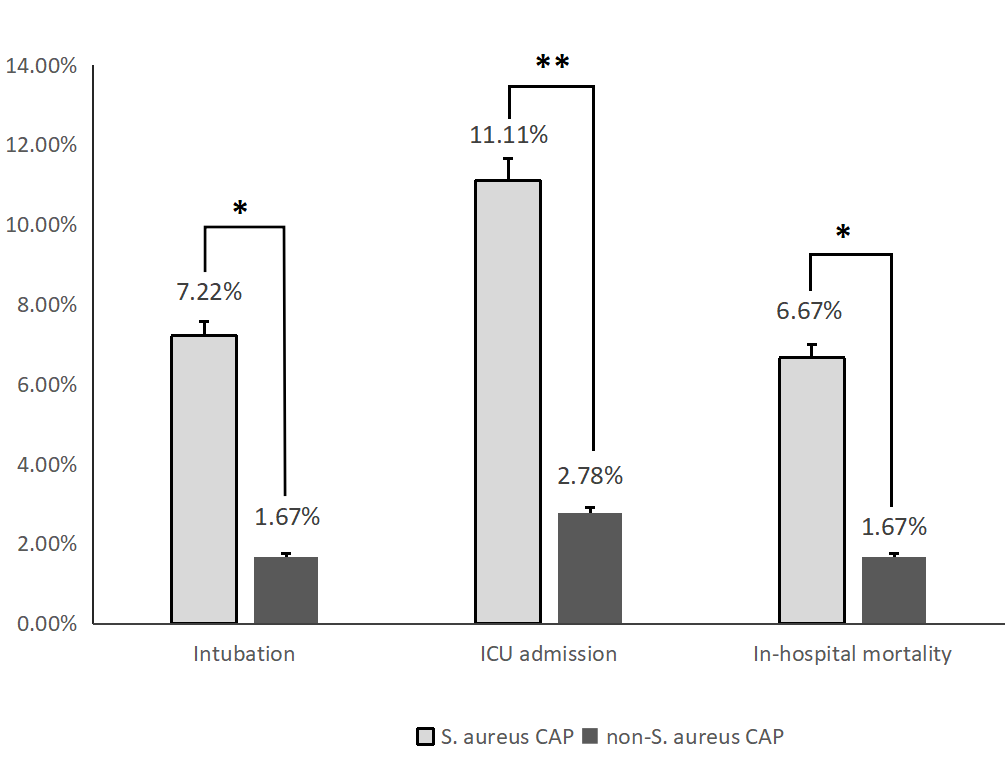


****p* ＜ 0.05、***p* ＜ 0.01、****p* ＜ 0.001**

Compared with the non-S. aureus group, the S. aureus group showed elevated rates of ICU admission, intubation, and mortality.
