# Supplementary material for: Risk Factors, Clinical Features, and Management of Community-Acquired Staphylococcus aureus Pneumonia in Chongqing, China
Source: Research Square preprint supplement (doi:10.21203/rs.3.rs-7255128/v1), 2025-09-09
Supplement: Supplementary file 2 [file ea60a0f9b10189ad2f2a3029.docx]

**Supplementary Table 1.** Empirical Antibiotic Therapy on Admission in patients with *S. aureus* CAP

| Antibiotic Categories | MRSA CAP (n=50) | MSSA CAP (n=130) |
| --- | --- | --- |
|
| Anti-staphylococcal penicillins & 1st-generation cephalosporins, n (%) | 0(0.00) | 0(0.00) |
| Other cephalosporins, n (%) | 3(6.00) | 17(13.08) |
| β-lactams, n (%) | 28(56.00) | 55(42.31) |
| Quinolones, n (%) | 4(8.00) | 29(22.31) |
| Vancomycin, n (%) | 1(2.00) | 4(3.08) |
| Linezolid, n (%) | 0(0.00) | 1(0.77) |
| Teicoplanin, n (%) | 3(6.00) | 0(0.00) |
| Tigecycline, n (%) | 1(2.00) | 1(0.77) |
| Carbapenems, n (%) | 13(0.26) | 19(14.62) |
| Aminoglycosides, n (%) | 1(2.00) | 0(0.00) |
| No antibiotic use, n (%) | 1(2.00) | 2(1.54) |
| Monotherapy (Number of antibiotics = 1) | 43(86.00) | 126(96.92) |
| Combination therapy (Number of antibiotics ≥ 2) | 7(14.00) | 4(3.08) |
| **β-lactams：All were piperacillin-tazobactam.**  **Aminoglycosides：Isepamicin** | | |

**Supplementary Table 2.**Targeted Antimicrobial Therapy After Pathogen Identification in patients with *S. aureus* CAP.

| Antibiotic Categories | MRSA CAP (n=50) | MSSA CAP (n=130) |
| --- | --- | --- |
|
| Anti-staphylococcal penicillins & 1st-generation cephalosporins, n (%) | 0(0.00) | 2(1.54) |
| Other cephalosporins, n (%) | 1(2.00) | 13(10.00) |
| β-lactams, n (%) | 23 (46.00) | 48(36.92) |
| Quinolones, n (%) | 11 (22.00) | 48(36.92) |
| Vancomycin, n (%) | 8 (16.00) | 7(5.38) |
| Linezolid, n (%) | 0 (00.00) | 3(2.31) |
| Teicoplanin, n (%) | 13 (26.00) | 7(5.38) |
| Tigecycline, n (%) | 2 (6.00) | 3(2.31) |
| Carbapenems, n (%) | 12(24.00) | 17(13.08) |
| No antibiotic use, n (%) | 1(2.00) | 3(2.31) |
| Monotherapy (Number of antibiotics =1), n (%) | 30(60.00) | 111(85.38) |
| Combination therapy (Number of antibiotics ≥ 2), n (%) | 20(40.00) | 19(14.62) |
| **β-lactams：All were piperacillin-tazobactam.** | | |

**Supplementary Table 3.**Targeted Antimicrobial Therapy After Pathogen Identification in patients with *S. aureus* CAP.

| Pathogen (%) | MRSA (n*=36) | MSSA(n*=65) | *S. aureus* CAP(n*=101) |
| --- | --- | --- | --- |
|
| Bacteria, n (%) | 23(63.89) | 43(66.15) | 66(65.35) |
| *Mycoplasma pneumoniae* , n (%) | 2(5.56) | 6(9.23) | 8(7.92) |
| *Streptococcus pneumoniae* , n (%) | 1(2.78) | 6(9.23) | 7(6.93) |
| Gram-negative bacteria, n (%) | 20(55.56) | 31(47.69) | 51(50.50) |
| *Pseudomonas aeruginosa*, n (%) | 7(19.44) | 7(10.77) | 14(13.86) |
| *Klebsiella pneumoniae*, n (%) | 5(13.89) | 7(10.77) | 12(11.88) |
| *Stenotrophomonas maltophilia* , n (%) | 3(8.33) | 0(0.00) | 3(2.97) |
| *Acinetobacter baumannii*, n (%) | 3(8.33) | 5(7.69) | 8(7.92) |
| *Haemophilus influenzae*, n (%) | 1(2.78) | 10(15.38) | 11(10.89) |
| *Moraxella catarrhalis* , n (%) | 0(0.00) | 1(1.54) | 1(0.99) |
| *Enterobacter cloacae*, n (%) | 1(2.78) | 1(1.54) | 2(1.98) |
| Viruses, n (%) | 6(10.71) | 17(26.15) | 23(22.77) |
| *Influenza*, n (%) | 0(0.00) | 3(4.62) | 3(2.97) |
| *SARS-CoV-2*, n (%) | 3(8.33) | 11(16.92) | 14(13.86) |
| *Epstein-Barr virus*, n (%) | 3(8.33) | 3(4.62) | 6(5.94) |
| Fungus, n (%) | 7(19.44) | 5(7.69) | 12(11.88) |
| *Aspergillu*, n (%) | 4(11.11) | 4(6.15) | 8(7.92) |
| *Candida*, n (%) | 3(8.33) | 1(1.54) | 4(3.96) |
| **n*: Number of pathogenic co-infecting pathogenic micro-organisms detected.** | | | |
